# Supplementary material for: Decorin promotes decidual M1-like macrophage polarization via mitochondrial dysfunction resulting in recurrent pregnancy loss
Source: PubMed Central journal article supplement (PMC9691373; doi:10.7150/thno.78467), 2022-10-17
Supplement: thnov12p7216s1.pdf [file thnov12p7216s1.pdf]

**Supplemental Table 1** The specific antibodies used for flow cytometry

| Antibodies                                                         | Identifier | Source         |
|--------------------------------------------------------------------|------------|----------------|
| Human Tristan FcX™                                                 | 422302     | Biolegend      |
| Mouse -anti human CD45 monoclonal antibody, APC                    | 304012     | Biolegend      |
| Mouse -anti human CD14 monoclonal antibody, FITC                   | 11-0149-42 | Thermo         |
| Mouse -anti human CD206 (MMR) monoclonal antibody,<br>PE- Cyanine7 | 25-2069-42 | Thermo         |
| Mouse -anti human CD86 (B7-2) monoclonal antibody, PE              | 12-0869-42 | Thermo         |
| Rat anti-mouse CD16/CD32 monoclonal antibody                       | 553142     | BD biosciences |
| Rat anti-mouse CD45 monoclonal antibody, APC                       | 103112     | Biolegend      |
| Rat anti-mouse F4/80 monoclonal antibody, FITC                     | 123108     | Biolegend      |
| Rat anti-mouse CD86 monoclonal antibody, PE                        | 105008     | Biolegend      |
| Rat anti-mouse CD206 (MMR) monoclonal antibody,<br>PE/Cy7          | 141720     | Biolegend      |

**Supplemental Table 2** The specific antibodies used for western blotting, immunohistochemistry and immunofluorescence staining

| Antibodies                                                  | Identifier | Source            |
|-------------------------------------------------------------|------------|-------------------|
| Rabbit polyclonal anti-decorin                              | 14667-1-AP | Proteintech       |
| Gambit monoclonal anti-CK7                                  | ab181598   | Abcam             |
| Mouse monoclonal anti-vimentin                              | 60330-1-Ig | Proteintech       |
| mouse monoclonal anti-CD68                                  | Sc-20060   | Santa             |
| Rabbit polyclonal anti-CD163                                | ab182422   | Abcam             |
| Rabbit polyclonal anti-CD206                                | ab64693    | Abcam             |
| Rabbit polyclonal anti-INOS                                 | ab3523     | Abcam             |
| Rabbit polyclonal anti-laminin                              | ab11575    | Abcam             |
| Goat polyclonal anti-CCR7                                   | NB100-712  | Novus Biologicals |
| Goat polyclonal anti-ARG1                                   | ab92274    | Abcam             |
| Rabbit polyclonal anti-DRP1                                 | 12957-1-AP | Proteintech       |
| Rabbit polyclonal anti-phospho-DRP1(S616)                   | PA5-64821  | ThermoFisher      |
| Rabbit polyclonal anti-OPA1                                 | 27733-1-AP | Proteintech       |
| Rabbit polyclonal anti-MFN1                                 | 13798-1-AP | Proteintech       |
| Rabbit polyclonal anti-MFN2                                 | 12186-1-AP | Proteintech       |
| Rabbit polyclonal anti-MyD88                                | AF5195     | Affinity          |
| Rabbit polyclonal anti-phosphor-NF- $\kappa$ B p65 (Ser536) | AF2006     | Affinity          |
| Rabbit polyclonal anti-NF- $\kappa$ B p65                   | 10745-1-AP | Proteintech       |
| Mouse monoclonal anti- $\beta$ -actin                       | 66009-1-Ig | Proteintech       |
| Goat anti-mouse IgG (488)                                   | A23210     | Babine            |
| Goat anti-rabbit IgG (594)                                  | A23420     | Abbkine           |
| Donkey anti-goat IgG (488)                                  | ab150129   | Abcam             |
| Donkey anti-mouse IgG (555)                                 | ab150106   | Abcam             |
| Goat anti-rabbit HRP                                        | SA00001-1  | Proteintech       |
| Rabbit anti-goat HRP                                        | SA00001-4  | Proteintech       |

**Supplemental Table 3** The primer sequences used in the study

| <b>Primer</b>                         | <b>Forward</b>               | <b>Reverse</b>               | <b>Product ( bp )</b> |
|---------------------------------------|------------------------------|------------------------------|-----------------------|
| Human- <i>DCN</i>                     | GACAACAACAAGC<br>TTACCAGAGTA | TGAAAAGACTCAC<br>ACCCGAATAAG | 163                   |
| Human- <i>PRL</i>                     | GCTGTAGAGATTG<br>AGGAGCA     | CATTTTCTTTGGTT<br>TCAGGA     | 88                    |
| Human- <i>IGFBP1</i>                  | TCACAGCAGACAG<br>TGTGAGAC    | CCCAGGGATCCTCT<br>TCCCAT     | 88                    |
| Human- $\beta$ - <i>ACTIN</i>         | CATGTACGTTGCTA<br>TCCAGGC    | CTCCTTAATGTCAC<br>GCACGAT    | 250                   |
| Mouse- <i>Inos</i>                    | GTTCTCAGCCCAA<br>CAATACAAGA  | GTGGACGGGTCGA<br>TGTCAC      | 127                   |
| Mouse- <i>Arg1</i>                    | CCACAGTCTGGCA<br>GTTGGAAG    | GGTTGTCAGGGGA<br>GTGTTGATG   | 106                   |
| Mouse- <i>Il-10</i>                   | GAGAAGCATGGCC<br>CAGAAATC    | CGCATCCTGAGGG<br>TCTTCA      | 71                    |
| Mouse- <i>Tgf-<math>\beta</math>1</i> | CAACAATTCCTGGC<br>GTTACCTTGG | GAAAGCCCTGTATT<br>CCGTCTCCTT | 128                   |
| Mouse- <i>Il-1<math>\beta</math></i>  | TGGACCTTCCAGG<br>ATGAGGACA   | GTTCATCTCGGAGC<br>CTGTAGTG   | 148                   |
| Mouse- <i>Tnf-<math>\alpha</math></i> | CCCTCACACTCAG<br>ATCATCTTCT  | GCTACGACGTGGG<br>CTACAG      | 61                    |
| Mouse- $\beta$ - <i>actin</i>         | GTGACGTTGACATC<br>CGTAAAGA   | GCCGGACTCATCG<br>TACTCC      | 245                   |

**Supplemental Table 4** Characteristics of women from the NP and RPL groups for flow cytometry

|                                   | <b>NP groups</b><br><b>( n = 30 )</b> | <b>RPL groups</b><br><b>( n = 21 )</b> | <b>P value</b> |
|-----------------------------------|---------------------------------------|----------------------------------------|----------------|
| <b>age ( y )</b>                  | 29.96 ± 3.58                          | 31.76 ± 4.31                           | > 0.05         |
| <b>BMI ( kg/m<sup>2</sup> )</b>   | 20.53 ± 1.26                          | 21.56 ± 2.39                           | > 0.05         |
| <b>Gestational day</b>            | 66.83 ± 6.75                          | 71.32 ± 11.52                          | > 0.05         |
| <b>Gravidity</b>                  | 2.00 (2.00)                           | 2.00 (2.00)                            | > 0.05         |
| <b>Spontaneous abortion times</b> | /                                     | 2.00 (1.75)                            | /              |
| <b>twice</b>                      | /                                     | 57.14%                                 | /              |
| <b>Third times</b>                | /                                     | 19.05%                                 | /              |
| <b>Four times</b>                 | /                                     | 14.29%                                 | /              |
| <b>Five times</b>                 | /                                     | 9.52%                                  | /              |

Note: Data are analyzed by Student's *t* test in mean±SEM or by the Mann–Whitney U test in median and IQR. NP, normal pregnancy; RPL, recurrent pregnancy loss. \**P* < 0.05. /: not applicable.

**Supplemental table 5** Characteristics of 126 women from normal early pregnancy

| Gestational weeks ( w )           | 5 w (n = 8)  | 6 w (n = 35) | 7 w (n = 31) | 8 w (n = 28) | 9 w (n = 12) | 10 w (n = 9) | 11 w (n = 3) | <i>P</i> value |
|-----------------------------------|--------------|--------------|--------------|--------------|--------------|--------------|--------------|----------------|
| age ( y )                         | 30.88 ± 6.13 | 29.09 ± 5.96 | 26.32 ± 4.14 | 27.92 ± 6.31 | 27.55 ± 4.99 | 28.33 ± 5.16 | 32.00 ± 3.27 | > 0.05         |
| Gravidity                         | 3.00 (1.00)  | 3.00 (2.00)  | 2.00 (2.00)  | 2.00 (1.00)  | 2.00 (1.75)  | 2.00 (2.00)  | 2.00 (1.00)  | > 0.05         |
| Parity                            | 1.00 (2.00)  | 1.00 (0.00)  | 0 (1)        | 1.00 (1.00)  | 1.00 (1.00)  | 0.00 (1.00)  | 1.00 (0.50)  | > 0.05         |
| Abortion for elective termination | 0.00         | 1.00 (2.00)  | 0 (1.00)     | 0.00 (1.00)  | 0 (0.75)     | 0.00 (1.00)  | 0.00 (0.50)  | > 0.05         |

Note: Data are analyzed by Student's *t* test in mean±SEM or by the Mann–Whitney U test in median and IQR. \**P* < 0.05.

**Supplemental table 6** The proportion of total decidua macrophages and decidua macrophage subsets with increasing gestational weeks during normal early pregnancy

| Gestational weeks (w)                                | 5 w           | 6 w           | 7 w           | 8 w           | 9 w                      | 10 w          | 11 w          |
|------------------------------------------------------|---------------|---------------|---------------|---------------|--------------------------|---------------|---------------|
| CD45 <sup>+</sup> CD14 <sup>+</sup> (%) <sup>a</sup> | 13.22 ± 7.27  | 23.40 ± 10.84 | 21.10 ± 9.13  | 22.66 ± 10.33 | 25.36 ± 11.43            | 25.12 ± 11.29 | 29.82 ± 10.7  |
| M1(%)                                                | 14.97 ± 11.69 | 17.25 ± 7.56  | 13.75 ± 10.13 | 13.16 ± 11.15 | 6.57 ± 6.47 <sup>b</sup> | 17.12 ± 13.0  | 5.76 ± 4.30   |
| M2(%)                                                | 45.30 ± 13.11 | 29.93 ± 15.82 | 28.70 ± 17.20 | 34.88 ± 21.45 | 44.55 ± 26.50            | 24.88 ± 14.08 | 42.35 ± 20.16 |
| Double positive (%)                                  | 21.54 ± 3.43  | 36.79 ± 20.57 | 41.24 ± 23.83 | 38.28 ± 22.89 | 32.50 ± 29.52            | 31.10 ± 11.71 | 39.52 ± 23.69 |
| M2/M1 ratio                                          | 5.33 ± 3.97   | 2.20 ± 1.66   | 5.02 ± 7.99   | 27.32 ± 80.02 | 65.48 ± 116.28           | 6.53 ± 10.50  | 19.97 ± 20.25 |

Note: Data are analyzed by one-way ANOVA in mean $\pm$ SEM. <sup>a</sup> indicates the percentage of CD45<sup>+</sup>CD14<sup>+</sup> in total leukocytes. <sup>b</sup> Indicates statistically significant differences at 9 w vs. 6 w.

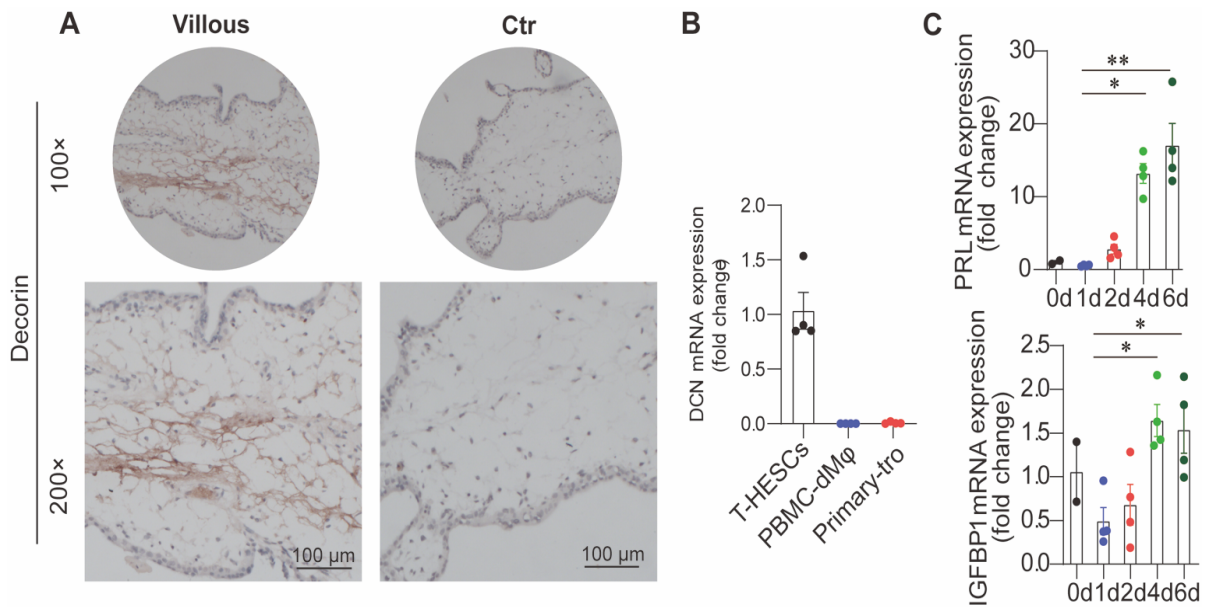

**Figure S1 Decorin is mainly secreted by DSCs** (A) The localization of decorin in villous of normal early pregnancy and RPL group by immunochemistry. Scale bar: 100 am. (B) RT-qPCR analysis of *DCN* mRNA in T-HESCs (day 6 after decidualization *in vitro*), PBMC-dM cells and primary trophoblasts (n = 4). PBMC-dM: peripheral blood monocyte cell-derived macrophages. PBMCs were sorted by MACS using CD14 microbeads and treated with 15 ng/ml M-CSF and 20 ng/ml IL-10 for 7 days *in vitro*. Primary trophoblasts were isolated from villous of normal early pregnancy. (C) PRL mRNA and IGFBP1 mRNA levels in T-HESCs were determined at the indicated time points (day 0 (0 d), 1 d, 2 d, 4 d and 6 d) after decidualization. (B, C) Data represent the mean  $\pm$  SEM and were analyzed by one-way ANOVA. \* $P < 0.05$ , \*\* $P < 0.01$ .

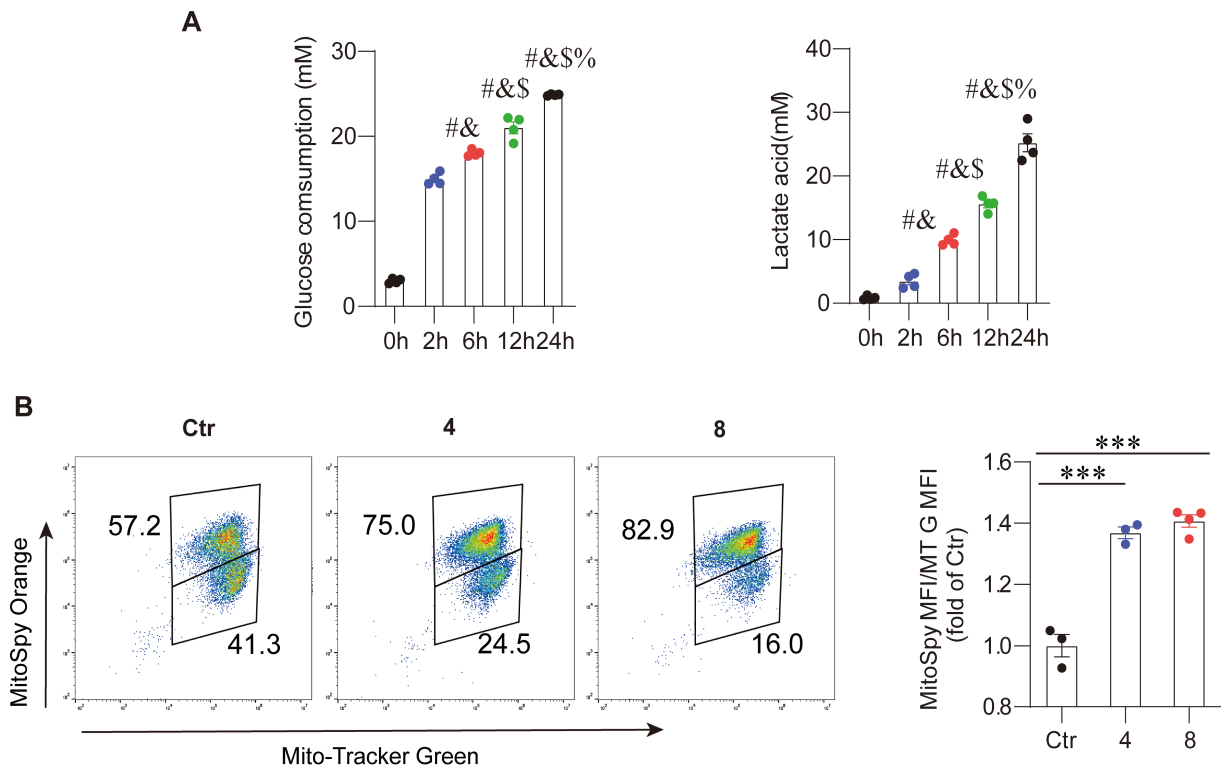

**Figure S2 Dysfunctional mitochondrial metabolism determines the inflammatory phenotype of decorin-treated macrophages** (A) Analysis of glucose consumption and lactate production in the supernatant of decorin-treated Raw264.7 cells at the indicated time points. (n=4 for each group). #, &, \$, % indicate statistically significant differences vs. 0 h, 2 h, 6 h and 12 h, respectively. (B) MitoSpy- and MTG-stained cells were tested by flow cytometry, and MMP was identified as the MitoSpy MFI/MTG MFI ratio. Data represent the mean  $\pm$  SEM and were analyzed by one-way ANOVA. \* $P < 0.05$ , \*\*\* $P < 0.001$ .
